# Supplementary material for: Ultrasound-propelled nanowire motors enhance asparaginase enzymatic activity against cancer cells
Source: Royal Society of Chemistry journal article supplement (doi:10.1039/c7nr07396h), 2017-01-01
Supplement: c7nr07396h1.pdf [file c7nr07396h1.pdf]

## Electronic Supporting Information (ESI)

### Ultrasound-propelled nanowire motors enhance asparaginase enzymatic activity against cancer cells

Murat Uygun,<sup>a, b</sup> Beatriz Jurado-Sánchez,<sup>a, c</sup> Deniz Aktas Uygun,<sup>a, b</sup> Virendra Vikram Singh,<sup>a</sup> Liangfang Zhang,<sup>a\*</sup> and Joseph Wang<sup>a\*</sup>

<sup>a</sup>. Department of Nanoengineering, University of California, San Diego, La Jolla, CA 92093, USA. E-mail: [zhang@ucsd.edu](mailto:zhang@ucsd.edu); [josephwang@ucsd.edu](mailto:josephwang@ucsd.edu)

<sup>b</sup>. Department of Chemistry, Faculty of Science and Arts, Adnan Menderes University, Aydın, Turkey

<sup>c</sup>. Department on Analytical Chemistry, Physical Chemistry and Chemical Engineering, University of Alcalá, Madrid, Spain

### Supporting videos

**SI Video 1.** Efficient ultrasound propulsion of a large population of asparaginase-modified motors.

### Figures

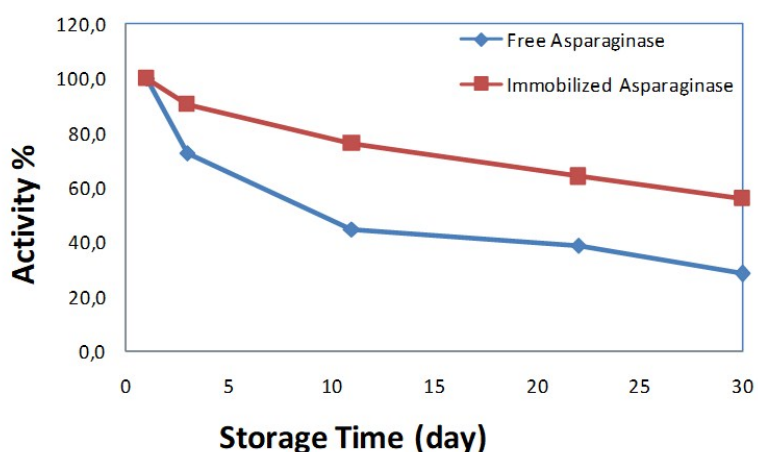

**Fig. S1.** Prolonged storage stability of asparaginase-modified Au/Ni/Au/PPy-COOH nanowire motors as compared with free enzyme.

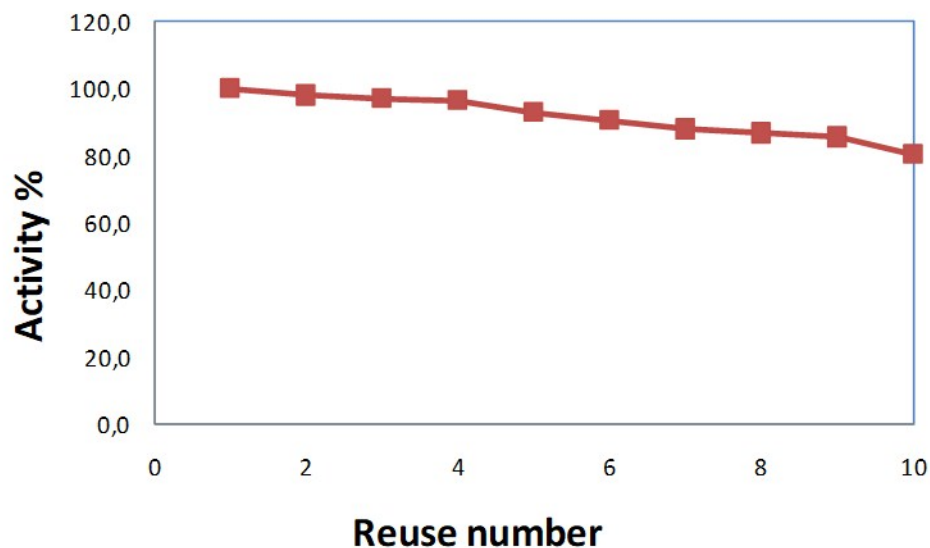

**Fig. S2.** Reusability profile of asparaginase-modified Au/Ni/Au/PPy-COOH nanowire motors.

#### Cancer cell inhibition studies

Cancer cell growth inhibition was conducted by [3-(4,5-dimethylthiazol-2-yl)-5-(3-carboxymethoxyphenyl)-2-(4-sulfophenyl)-2H-tetrazolium inner salt; MTS] Cell Proliferation Assay (CellTiter 96® AQueous One Solution Cell Proliferation Assay). The method is based on the reduction of MTS tetrazolium compound by viable cells to generate a coloured formazan product that is soluble in cell culture media. This conversion is thought to be carried out by NAD(P)H-dependent dehydrogenase enzymes in metabolically active cells. The formazan dye produced by viable cells can be quantified by measuring the absorbance at 490-500 nm. The extension of cell death/growth inhibition was estimated by the decrease in MTS absorbance. Cells were harvested at 80% confluency and plated in 96-well plates at 1000 cells per well in 100  $\mu$ L of media per well. To check the efficiency of US-driven asparaginase-immobilized Au-Ni-Au-PPy, US-driven Au-Ni-Au-PPy nanowires, free enzyme and its static counterparts, cell solutions were taken into separate US holders in 25  $\mu$ L aqueous solutions containing  $5.75 \times 10^4$  motors/mL. Cells without asparaginase or micromotors were included in each experiment as controls. Each reaction mixture -except static conditions- was subjected to an US amplitude of 5 V, and frequency of 2.83 MHz for 30 min. Cells were removed from the US holder and after 24 h incubation, 20  $\mu$ L of CellTiter 96® Aqueous were added to MTS solution reagent. The conversion of MTS into formazan by metabolically active cells indicated the extent of cell viability. After 1 h incubation at 37 °C in a humidified, 5% CO<sub>2</sub> atmosphere, the absorbance was measured at 490 nm using a microplate reader (Biotek Synergy MX, Mandel Scientific Inc.) for the quantification of cell viability.
